# Supplementary material
Source: PubMed Central journal article supplement (PMC2148378)

A.

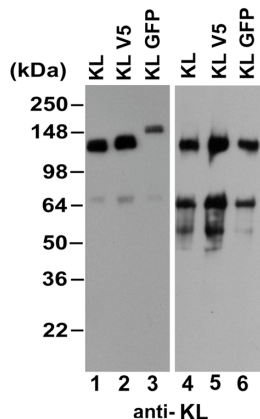

B.

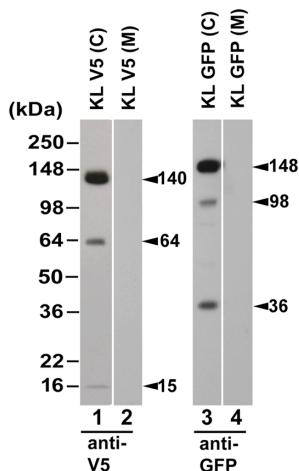

D.

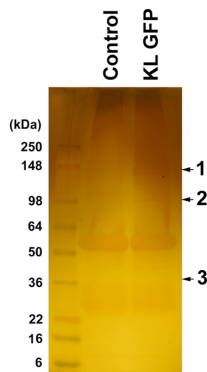

E.

RRRLRAEPGDGAQTWARFSRPPAPEAAGLFQGTFFPDGFLWAVGSAAYQTEGG  
 WQQHGK**GAS**I**WDTFTHHPLAPPDGS**SRNASLPLGAPSPLOPATGDVADSDSYN  
 NVFR**DEALRELGVTHYRFS**I**SWARVLPNGSAGVPPNREG**LRYRRLERLR  
**ELGVQPVVTVLHYWDL**P**QRLQDAYGGWANRALADHFRDYAELCFRHF**GGQVK  
 YWITIDNPYVVAWHGYATGR**LAPGIR**GSPRLGYLVAHNLLLAHAKVWHLYN  
 TSFRPTQGGQVSIALSSHWINPR**MTDHSI**K**ECQKSLDFVLGWFAK**PVFI  
 GDYPESMKNNLSSILPDTFTESEKFKIKGTADFFALCFGPTLSFQLLDPHMK  
**FRQLES****PNLR**QLLSWIDLEFNHPQIFIVENGWVFSGTTKRDDAKYMYLKK  
 FIMETLKAIKLDGVDVIGYTAWSLMDGF**FEWHRGYSIRRG**L**FYVD**F**LSQDKM**  
**LLPKSSALFYQ**KLIEKNGFPPLEPNQPLEGTFPCDFAWGVVDNYIQVDTTL  
 SQFTDLNVYLWDVHHSKRLIKVDGVVTKKRKSYCVDFAAIQPQIALLQEMH  
 VTHFRFSLDWALILPLGNQSQVNHTILQYR**CMASELVR**VNITPVVALWQP  
 MAPNQGLPRLAR**QGAWENPYTALAF**AEYAR**LCFQELGHVHVKLWI**TMNEPY  
**TRN**MTYSAGHNLL**KAHALAWHVYNEK**FRHAQNGK**SIALQADWIEPAC**PFPS  
**QDK**KEVAERVLEFDIGWLAEP**IFGSGDYPVWMRDWLNQRN**NLLPYFTEDE  
**KKLI**QGTFFDLALSHYTTILVDSSEKEDPIKYNDYLEVQEMTDITWLN**SPSQ**  
 VAVVPWGLR**KLVLNWLK**FKYGDLPMPYIISNGIDDGLHAEDDQLR**VYVMQ**NYI  
**NEALK**AHILDGINLCGYFAYSFNDRTAPR**FGLYRYAADQFEPK**ASMKHYRK  
**IIDS**NGFP**PETLER****FCPEEFTVCTECSFFHTR**KSLLA**FI**A**FLFFAS**IIISL  
 SLIFYYSKGRRSYK**KGQNSADIQHS**GGRSSMVSK**GEE**L**FTGVV**PILVEL  
**DGDVNGHKFSV**SEGE**GDATA**Y**GK**LL**LK**FI**CT**TGKLPVPWP**TLV**TTLY**GVQ**  
**CF**SR**Y**PD**HMKQ**HD**FFKS**AMPE**GVQERT**I**FFKDDGNKYK**TRAE**VK**FE**GD**TLV  
**NR**IEL**K**GID**FKEDGNILGH**KLE**VYN**SHNVY**IMADK**QNGIKVNF**KIR**HN  
 EDGSVQLADHYQNTPIGDGPVLLPDNHYLSTQ**SALSKD**PNEKR**DH**MVLE  
 FVTAAGITLGMDELYK

C.

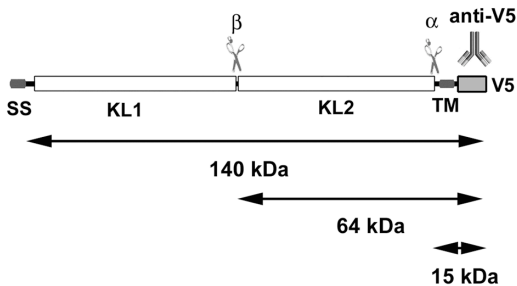

Supplement: pnas_0709805104_2.pdf [file pnas_0709805104_2.pdf]
