# Supplementary material
Source: PubMed Central journal article supplement (PMC2148378)

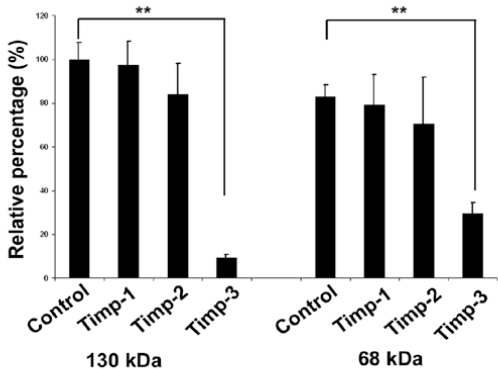

Supplement: pnas_0709805104_3.pdf [file pnas_0709805104_3.pdf]

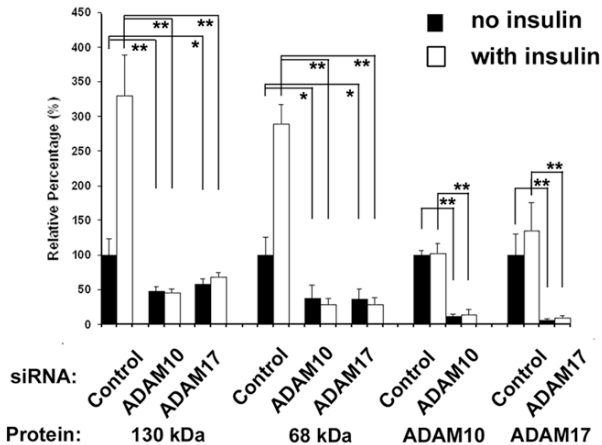

Supplement: pnas_0709805104_4.pdf [file pnas_0709805104_4.pdf]

A.

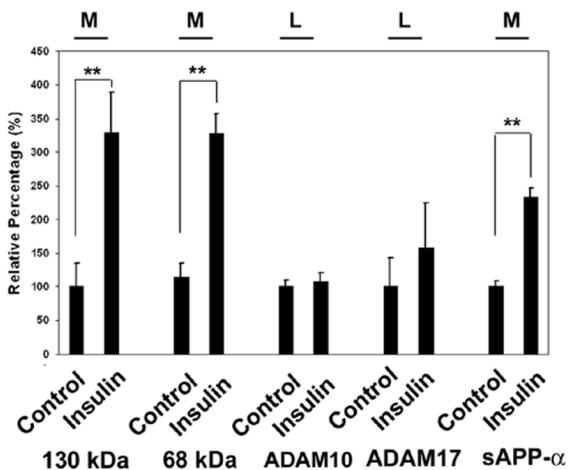

B.

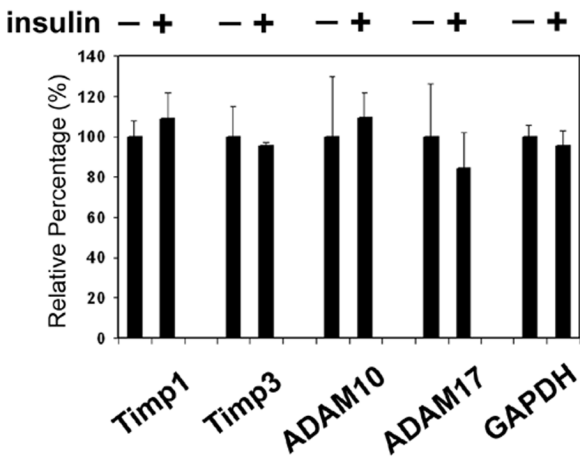

Supplement: pnas_0709805104_5.pdf [file pnas_0709805104_5.pdf]
